# Supplementary material for: Advanced artificial synaptic thin-film transistor based on doped potassium ions for neuromorphic computing via third-generation neural network
Source: Royal Society of Chemistry journal article supplement (doi:10.1039/d1tc04827a), 2022-01-01
Supplement: d1tc04827a1.pdf [file d1tc04827a1.pdf]

## Supporting Information

### Advanced artificial synaptic thin-film transistor based on doped potassium ions for neuromorphic computing via third-generation neural network

*Yixin Cao, Tianshi Zhao, Chun Zhao\*, Yina Liu, Pengfei Song, Hao Gao, Ce Zhou Zhao*

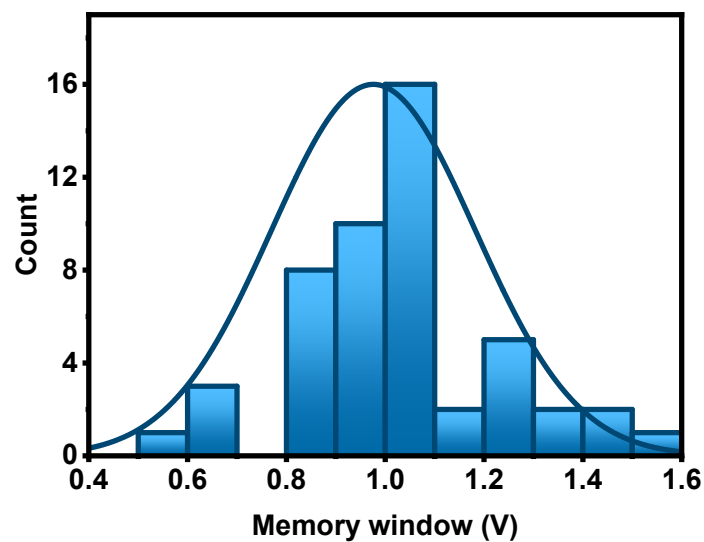

**Figure S1.** Distribution diagram of  $K^+$  doped  $AlO_x$  artificial synaptic TFT memory window.

---

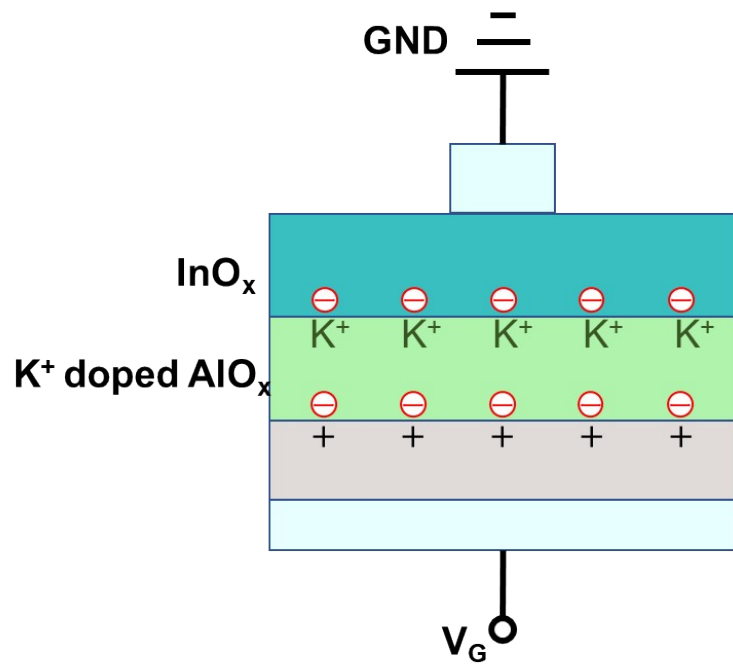

Figure S2. Schematic diagram of metal-insulated semiconductor structure.

---

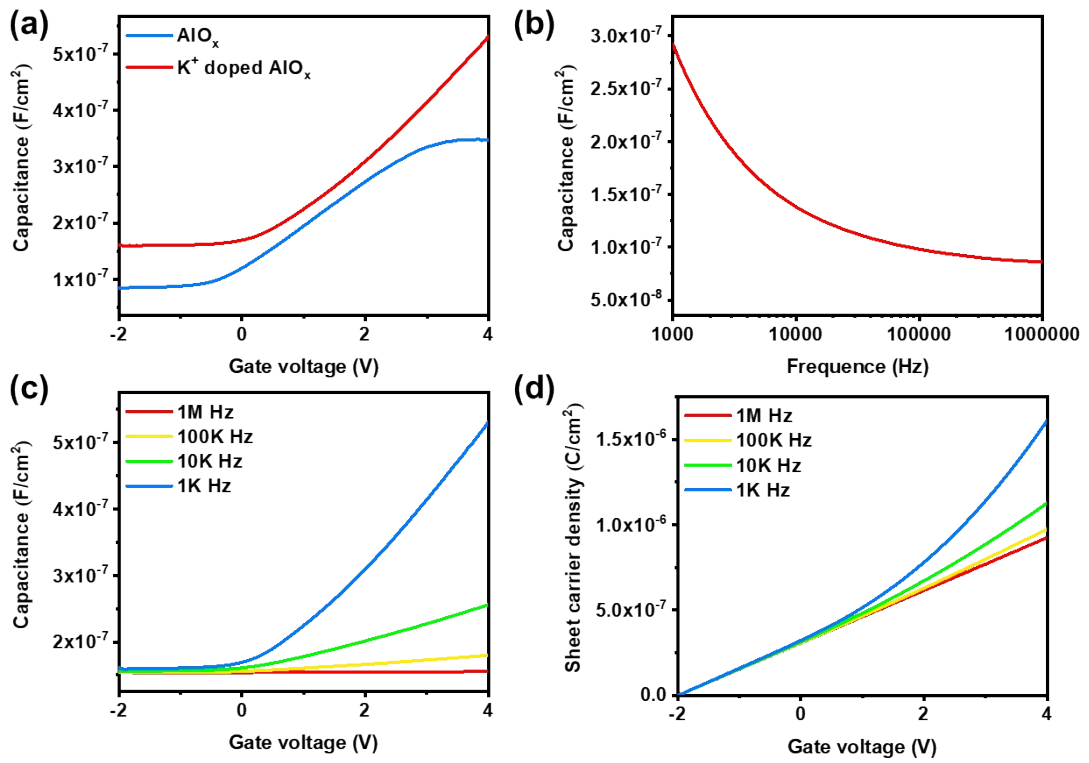

**Figure S3.** (a) C-V measurement comparison of metal-insulated semiconductor structure with and without  $K^+$  doped TFT. (b) C-F measurement of metal-insulated semiconductor structure. (c) C-V relationship at different frequencies. (d) Comparison of sheet carrier density of the interface at a different frequency

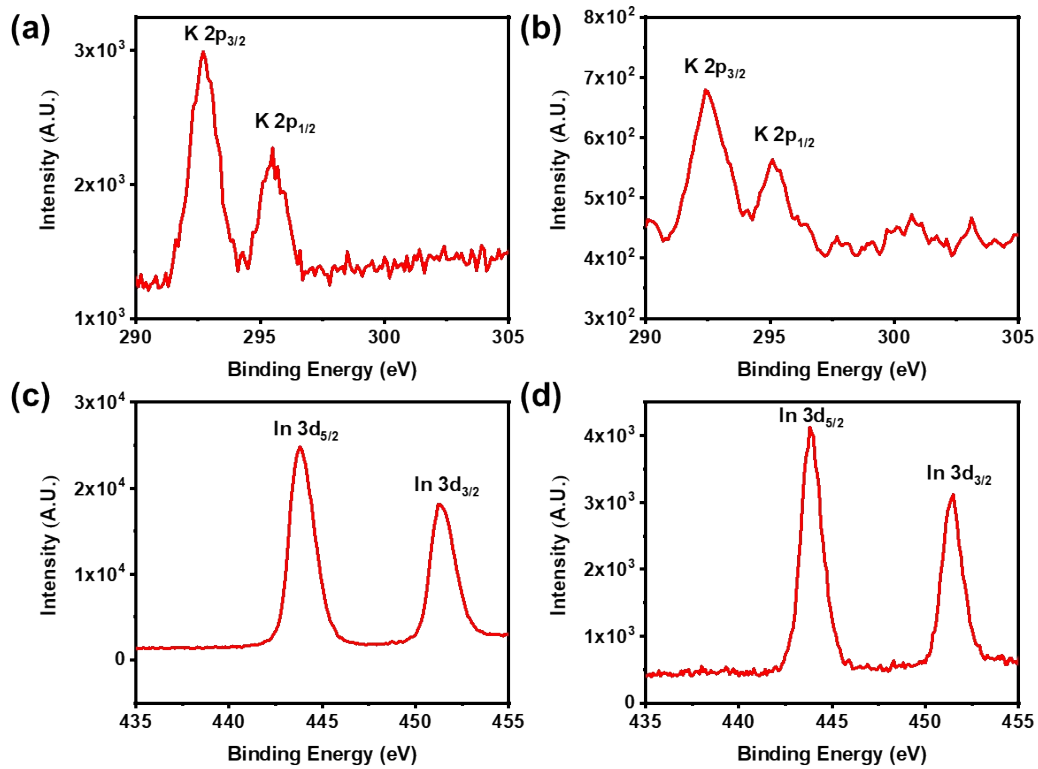

**Figure S4.** K 2p spectra detected on the  $InO_x$  surface (a) with no bias applied and (b) after strong bias. In 3d spectra detected on the  $InO_x$  surface (c) with no bias applied and (d) after strong bias

**Table S1.** In  $3d_{5/2}$  and K  $2p_{3/2}$  peaks area with/without strong bias and the ratios of In atom and K atom with/without strong bias.

| <b>Status</b>     | <b>Element</b> | <b>Area</b> | <b>R.S.F</b> | <b>Ratio</b>  |
|-------------------|----------------|-------------|--------------|---------------|
| No bias applied   | In $3d_{5/2}$  | 39176.8     | 22.54        |               |
| No bias applied   | K $2p_{3/2}$   | 2063.1      | 3.97         | K/In = 29.89% |
| After strong bias | In $3d_{5/2}$  | 5031.6      | 22.54        |               |
| After strong bias | K $2p_{3/2}$   | 311.4       | 3.97         | K/In = 35.13% |

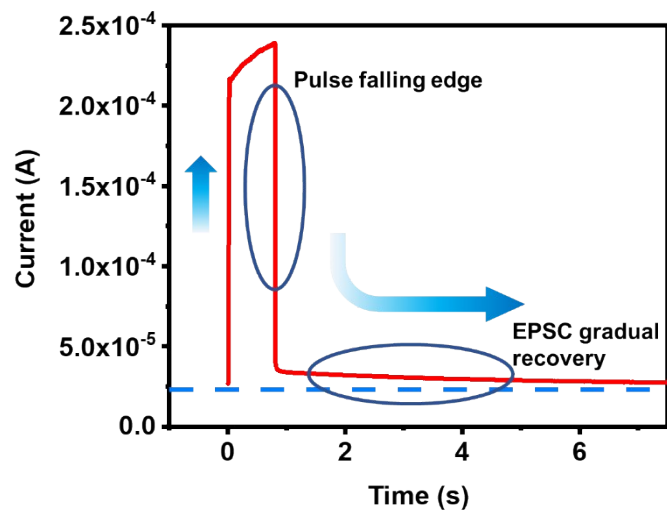

Figure S5. EPSC generated by the presynaptic spike (4 V, 1000 ms).

---

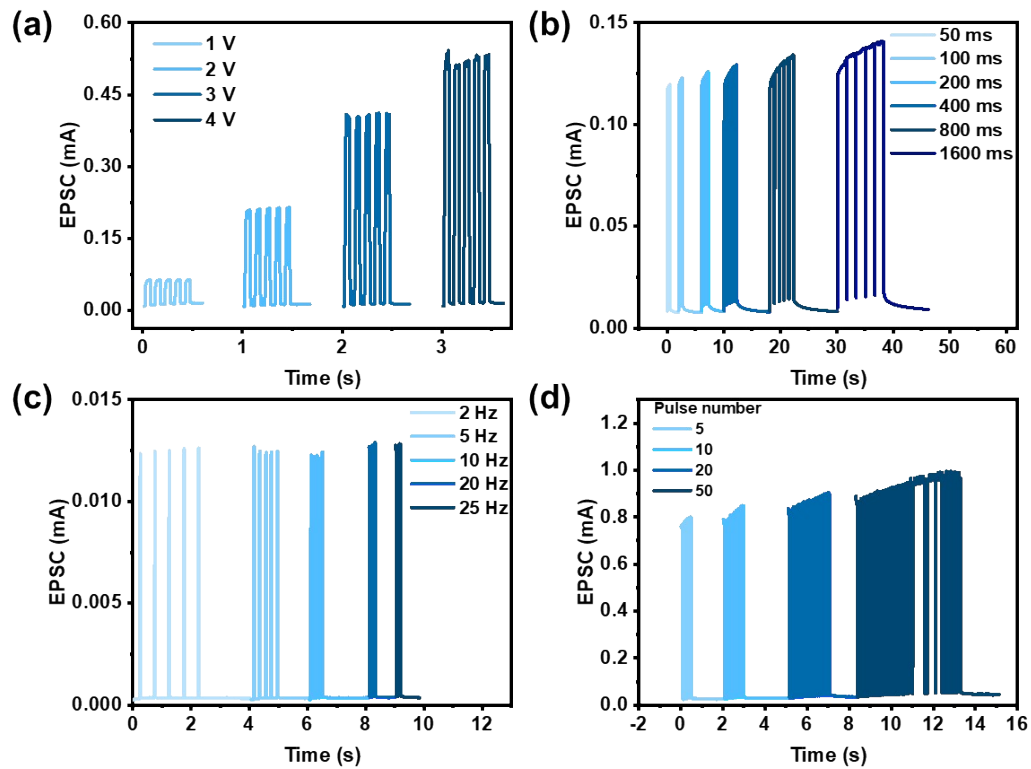

**Figure S6.** (a) EPSC generated by five presynaptic spikes (1 V to 4 V, 50 ms),  $\Delta t$  is 50 ms ( $V_{ds} = 2$  V). (b) EPSC generated by five consecutive presynaptic pulses (2 V, 50 ms), the pulse time varies from 50 ms to 1600 ms ( $V_{ds} = 2$  V). (c) EPSC ( $V_{ds} = 4$  V) was generated by five presynaptic spikes (4 V, 30 ms) with different pulse frequencies (2 Hz-25 Hz). (d) EPSC generated by different numbers (5-50 times) of presynaptic spikes (4 V, 80 ms).

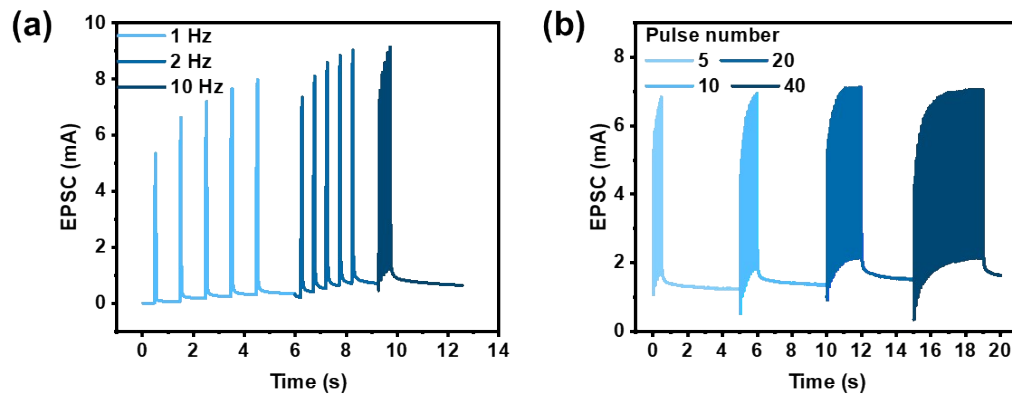

**Figure S7.** (a) EPSC ( $V_{ds} = 4$  V) was generated by five presynaptic spikes (4 V, 30 ms) with different pulse frequencies (1 Hz-10 Hz). (b) EPSC is generated by different numbers (5-40 times) of presynaptic spikes (4 V, 80 ms).

---



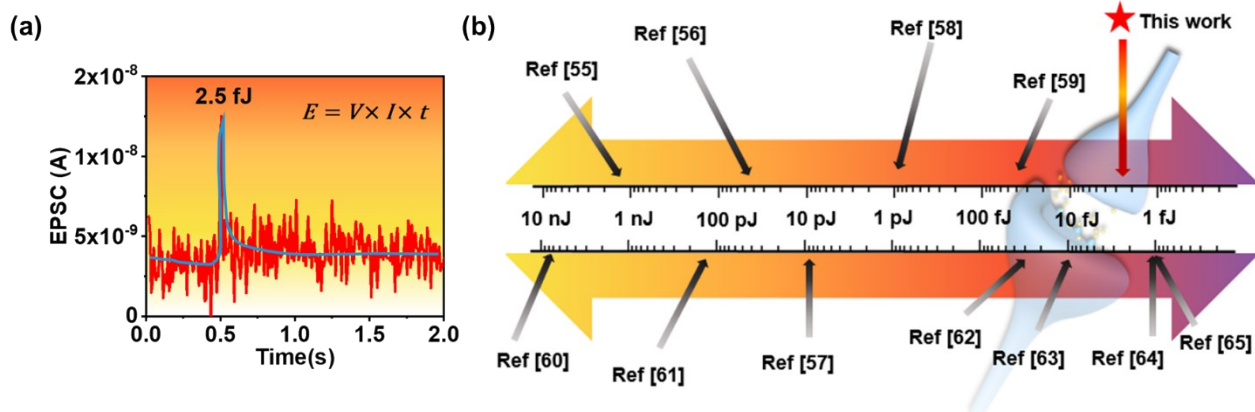

**Figure S8.** (a) EPSC stimulated by a single electrical spike (500 mV, 2 ms) at ultra-low drain voltage ( $V_{ds} = 160 \mu\text{V}$ ). (b) The Comparison of the power consumption among the artificial synaptic transistors.

Table. S2. The function between nonlinearity NL and  $A_{PD}$

| NL   | A      |
|------|--------|------|--------|------|--------|------|--------|------|--------|------|--------|------|--------|------|--------|
| 0.01 | 125.27 | 0.51 | 2.4702 | 1.01 | 1.2390 | 1.51 | 0.8195 | 2.01 | 0.6058 | 2.51 | 0.4748 | 3.01 | 0.3853 | 3.51 | 0.3194 |
| 0.02 | 63.134 | 0.52 | 2.4225 | 1.02 | 1.2257 | 1.52 | 0.8139 | 2.02 | 0.6025 | 2.52 | 0.4727 | 3.02 | 0.3838 | 3.52 | 0.3183 |
| 0.03 | 42.089 | 0.53 | 2.3755 | 1.03 | 1.2145 | 1.53 | 0.8083 | 2.03 | 0.5994 | 2.53 | 0.4705 | 3.03 | 0.3823 | 3.53 | 0.3171 |
| 0.04 | 31.556 | 0.54 | 2.3324 | 1.04 | 1.2026 | 1.54 | 0.8028 | 2.04 | 0.5952 | 2.54 | 0.4685 | 3.04 | 0.3808 | 3.54 | 0.316  |
| 0.05 | 25.253 | 0.55 | 2.2897 | 1.05 | 1.191  | 1.55 | 0.7974 | 2.05 | 0.5931 | 2.55 | 0.4665 | 3.05 | 0.3793 | 3.55 | 0.3148 |
| 0.06 | 21.044 | 0.56 | 2.2485 | 1.06 | 1.1795 | 1.56 | 0.7921 | 2.06 | 0.59   | 2.56 | 0.4644 | 3.06 | 0.3779 | 3.56 | 0.3137 |
| 0.07 | 18.038 | 0.57 | 2.2090 | 1.07 | 1.1683 | 1.57 | 0.7858 | 2.07 | 0.5859 | 2.57 | 0.4624 | 3.07 | 0.3764 | 3.57 | 0.3125 |
| 0.08 | 15.782 | 0.58 | 2.1707 | 1.08 | 1.1572 | 1.58 | 0.7815 | 2.08 | 0.5838 | 2.58 | 0.4604 | 3.08 | 0.3749 | 3.58 | 0.3115 |
| 0.09 | 14.029 | 0.59 | 2.1337 | 1.09 | 1.1454 | 1.59 | 0.7765 | 2.09 | 0.5808 | 2.59 | 0.4584 | 3.09 | 0.3735 | 3.59 | 0.3104 |
| 0.1  | 12.626 | 0.6  | 2.0979 | 1.1  | 1.1357 | 1.6  | 0.7714 | 2.1  | 0.5778 | 2.6  | 0.4564 | 3.1  | 0.372  | 3.6  | 0.3093 |
| 0.11 | 11.478 | 0.61 | 2.0533 | 1.11 | 1.1253 | 1.61 | 0.7654 | 2.11 | 0.5749 | 2.61 | 0.4544 | 3.11 | 0.3705 | 3.61 | 0.3082 |
| 0.12 | 10.521 | 0.62 | 2.0298 | 1.12 | 1.115  | 1.62 | 0.7615 | 2.12 | 0.5719 | 2.62 | 0.4524 | 3.12 | 0.3692 | 3.62 | 0.3071 |
| 0.13 | 9.7116 | 0.63 | 1.9973 | 1.13 | 1.1049 | 1.63 | 0.7555 | 2.13 | 0.569  | 2.63 | 0.4505 | 3.13 | 0.3678 | 3.63 | 0.306  |
| 0.14 | 9.0177 | 0.64 | 1.9559 | 1.14 | 1.095  | 1.64 | 0.7517 | 2.14 | 0.5661 | 2.64 | 0.4485 | 3.14 | 0.3664 | 3.64 | 0.3049 |
| 0.15 | 8.4163 | 0.65 | 1.9354 | 1.15 | 1.0853 | 1.65 | 0.7459 | 2.15 | 0.5633 | 2.65 | 0.4466 | 3.15 | 0.365  | 3.65 | 0.3038 |
| 0.16 | 7.8901 | 0.66 | 1.9059 | 1.16 | 1.0757 | 1.66 | 0.7422 | 2.16 | 0.5604 | 2.66 | 0.4447 | 3.16 | 0.3635 | 3.66 | 0.3028 |
| 0.17 | 7.4257 | 0.67 | 1.8772 | 1.17 | 1.0663 | 1.67 | 0.7375 | 2.17 | 0.5576 | 2.67 | 0.4428 | 3.17 | 0.3622 | 3.67 | 0.3017 |
| 0.18 | 7.0130 | 0.68 | 1.8494 | 1.18 | 1.057  | 1.68 | 0.7329 | 2.18 | 0.5548 | 2.68 | 0.4409 | 3.18 | 0.3608 | 3.68 | 0.3005 |
| 0.19 | 6.6437 | 0.69 | 1.8224 | 1.19 | 1.0479 | 1.69 | 0.7284 | 2.19 | 0.5521 | 2.69 | 0.439  | 3.19 | 0.3594 | 3.69 | 0.2996 |
| 0.2  | 6.3113 | 0.7  | 1.7951 | 1.2  | 1.039  | 1.7  | 0.7239 | 2.2  | 0.5493 | 2.7  | 0.4372 | 3.2  | 0.3581 | 3.7  | 0.2985 |
| 0.21 | 6.0105 | 0.71 | 1.7705 | 1.21 | 1.0302 | 1.71 | 0.7194 | 2.21 | 0.5466 | 2.71 | 0.4353 | 3.21 | 0.3567 | 3.71 | 0.2975 |
| 0.22 | 5.7371 | 0.72 | 1.7458 | 1.22 | 1.0215 | 1.72 | 0.715  | 2.22 | 0.5439 | 2.72 | 0.4335 | 3.22 | 0.3554 | 3.72 | 0.2964 |
| 0.23 | 5.4874 | 0.73 | 1.7217 | 1.23 | 1.013  | 1.73 | 0.7105 | 2.23 | 0.5413 | 2.73 | 0.4317 | 3.23 | 0.3541 | 3.73 | 0.2954 |
| 0.24 | 5.2585 | 0.74 | 1.6982 | 1.24 | 1.0045 | 1.74 | 0.7053 | 2.24 | 0.5385 | 2.74 | 0.4299 | 3.24 | 0.3527 | 3.74 | 0.2944 |
| 0.25 | 5.0480 | 0.75 | 1.6753 | 1.25 | 0.9953 | 1.75 | 0.7021 | 2.25 | 0.535  | 2.75 | 0.4281 | 3.25 | 0.3514 | 3.75 | 0.2933 |
| 0.26 | 4.8535 | 0.76 | 1.6531 | 1.26 | 0.9882 | 1.76 | 0.6979 | 2.26 | 0.5334 | 2.76 | 0.4263 | 3.26 | 0.3501 | 3.76 | 0.2923 |
| 0.27 | 4.6737 | 0.77 | 1.6314 | 1.27 | 0.9802 | 1.77 | 0.6937 | 2.27 | 0.5308 | 2.77 | 0.4245 | 3.27 | 0.3488 | 3.77 | 0.2913 |
| 0.28 | 4.5055 | 0.78 | 1.6102 | 1.28 | 0.9723 | 1.78 | 0.6895 | 2.28 | 0.5283 | 2.78 | 0.4228 | 3.28 | 0.3475 | 3.78 | 0.2903 |
| 0.29 | 4.3509 | 0.79 | 1.5895 | 1.29 | 0.9645 | 1.79 | 0.6855 | 2.29 | 0.5257 | 2.79 | 0.421  | 3.29 | 0.3462 | 3.79 | 0.2893 |
| 0.3  | 4.2057 | 0.8  | 1.5695 | 1.3  | 0.9569 | 1.8  | 0.6815 | 2.3  | 0.5232 | 2.8  | 0.4193 | 3.3  | 0.3449 | 3.8  | 0.2883 |
| 0.31 | 4.0598 | 0.81 | 1.5499 | 1.31 | 0.9494 | 1.81 | 0.6775 | 2.31 | 0.5207 | 2.81 | 0.4175 | 3.31 | 0.3436 | 3.81 | 0.2873 |
| 0.32 | 3.9424 | 0.82 | 1.5308 | 1.32 | 0.942  | 1.82 | 0.6735 | 2.32 | 0.5183 | 2.82 | 0.4159 | 3.32 | 0.3424 | 3.82 | 0.2863 |
| 0.33 | 3.8227 | 0.83 | 1.5122 | 1.33 | 0.9347 | 1.83 | 0.6696 | 2.33 | 0.5158 | 2.83 | 0.4142 | 3.33 | 0.3411 | 3.83 | 0.2853 |
| 0.34 | 3.7101 | 0.84 | 1.4939 | 1.34 | 0.9257 | 1.84 | 0.6658 | 2.34 | 0.5134 | 2.84 | 0.4125 | 3.34 | 0.3398 | 3.84 | 0.2843 |
| 0.35 | 3.6038 | 0.85 | 1.4761 | 1.35 | 0.9204 | 1.85 | 0.6619 | 2.35 | 0.511  | 2.85 | 0.4108 | 3.35 | 0.3386 | 3.85 | 0.2833 |
| 0.36 | 3.5035 | 0.86 | 1.4588 | 1.36 | 0.9134 | 1.86 | 0.6582 | 2.36 | 0.5085 | 2.86 | 0.4091 | 3.36 | 0.3373 | 3.86 | 0.2823 |
| 0.37 | 3.4085 | 0.87 | 1.4418 | 1.37 | 0.9055 | 1.87 | 0.6544 | 2.37 | 0.5062 | 2.87 | 0.4075 | 3.37 | 0.3361 | 3.87 | 0.2814 |
| 0.38 | 3.3187 | 0.88 | 1.4253 | 1.38 | 0.8997 | 1.88 | 0.6507 | 2.38 | 0.5038 | 2.88 | 0.4058 | 3.38 | 0.3349 | 3.88 | 0.2804 |
| 0.39 | 3.2334 | 0.89 | 1.4089 | 1.39 | 0.893  | 1.89 | 0.647  | 2.39 | 0.5015 | 2.89 | 0.4042 | 3.39 | 0.3336 | 3.89 | 0.2794 |
| 0.4  | 3.1523 | 0.9  | 1.3931 | 1.4  | 0.8854 | 1.9  | 0.6434 | 2.4  | 0.4992 | 2.9  | 0.4025 | 3.4  | 0.3324 | 3.9  | 0.2785 |
| 0.41 | 3.0752 | 0.91 | 1.3775 | 1.41 | 0.8799 | 1.91 | 0.6398 | 2.41 | 0.4969 | 2.91 | 0.4009 | 3.41 | 0.3312 | 3.91 | 0.2775 |
| 0.42 | 3.0018 | 0.92 | 1.3523 | 1.42 | 0.8735 | 1.92 | 0.6353 | 2.42 | 0.4945 | 2.92 | 0.3993 | 3.42 | 0.33   | 3.92 | 0.2766 |
| 0.43 | 2.9318 | 0.93 | 1.3475 | 1.43 | 0.8672 | 1.93 | 0.6327 | 2.43 | 0.4923 | 2.93 | 0.3977 | 3.43 | 0.3288 | 3.93 | 0.2756 |
| 0.44 | 2.8549 | 0.94 | 1.3329 | 1.44 | 0.8609 | 1.94 | 0.6292 | 2.44 | 0.4901 | 2.94 | 0.3961 | 3.44 | 0.3275 | 3.94 | 0.2747 |
| 0.45 | 2.8010 | 0.95 | 1.3187 | 1.45 | 0.8548 | 1.95 | 0.6258 | 2.45 | 0.4879 | 2.95 | 0.3946 | 3.45 | 0.3264 | 3.95 | 0.2737 |
| 0.46 | 2.7399 | 0.96 | 1.3047 | 1.46 | 0.8487 | 1.96 | 0.6224 | 2.46 | 0.4856 | 2.96 | 0.393  | 3.46 | 0.3252 | 3.96 | 0.2728 |
| 0.47 | 2.6814 | 0.97 | 1.2910 | 1.47 | 0.8427 | 1.97 | 0.619  | 2.47 | 0.4835 | 2.97 | 0.3914 | 3.47 | 0.324  | 3.97 | 0.2719 |
| 0.48 | 2.6253 | 0.98 | 1.2776 | 1.48 | 0.8358 | 1.98 | 0.6156 | 2.48 | 0.4813 | 2.98 | 0.3899 | 3.48 | 0.3229 | 3.98 | 0.2709 |
| 0.49 | 2.5715 | 0.99 | 1.2645 | 1.49 | 0.8309 | 1.99 | 0.6123 | 2.49 | 0.4791 | 2.99 | 0.3884 | 3.49 | 0.3217 | 3.99 | 0.27   |
| 0.5  | 2.5199 | 1    | 1.2517 | 1.5  | 0.8252 | 2    | 0.609  | 2.5  | 0.477  | 3    | 0.3868 | 3.5  | 0.3205 | 4    | 0.2691 |
